# Supplementary material
Source: PubMed Central journal article supplement (PMC3838363)
Supplement: NIHMS3726-supplement-1.pdf [file NIHMS3726-supplement-1.pdf]

## Supplemental Data

### Transcription Factor Substitution during the Evolution of Fungal Ribosome Regulation

Hervé Hogues, Hugo Lavoie, Adnane Sellam, Maria Mangos, Terry Roemer,  
Enrico Purisima, André Nantel, and Malcolm Whiteway

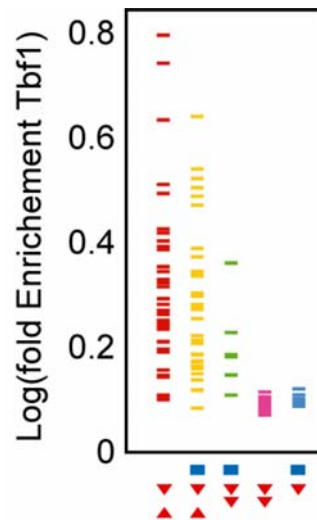

Figure S1. Tbf1 and Cbf1 elements organization predict Tbf1 binding in ChIP-CHIP experiments.

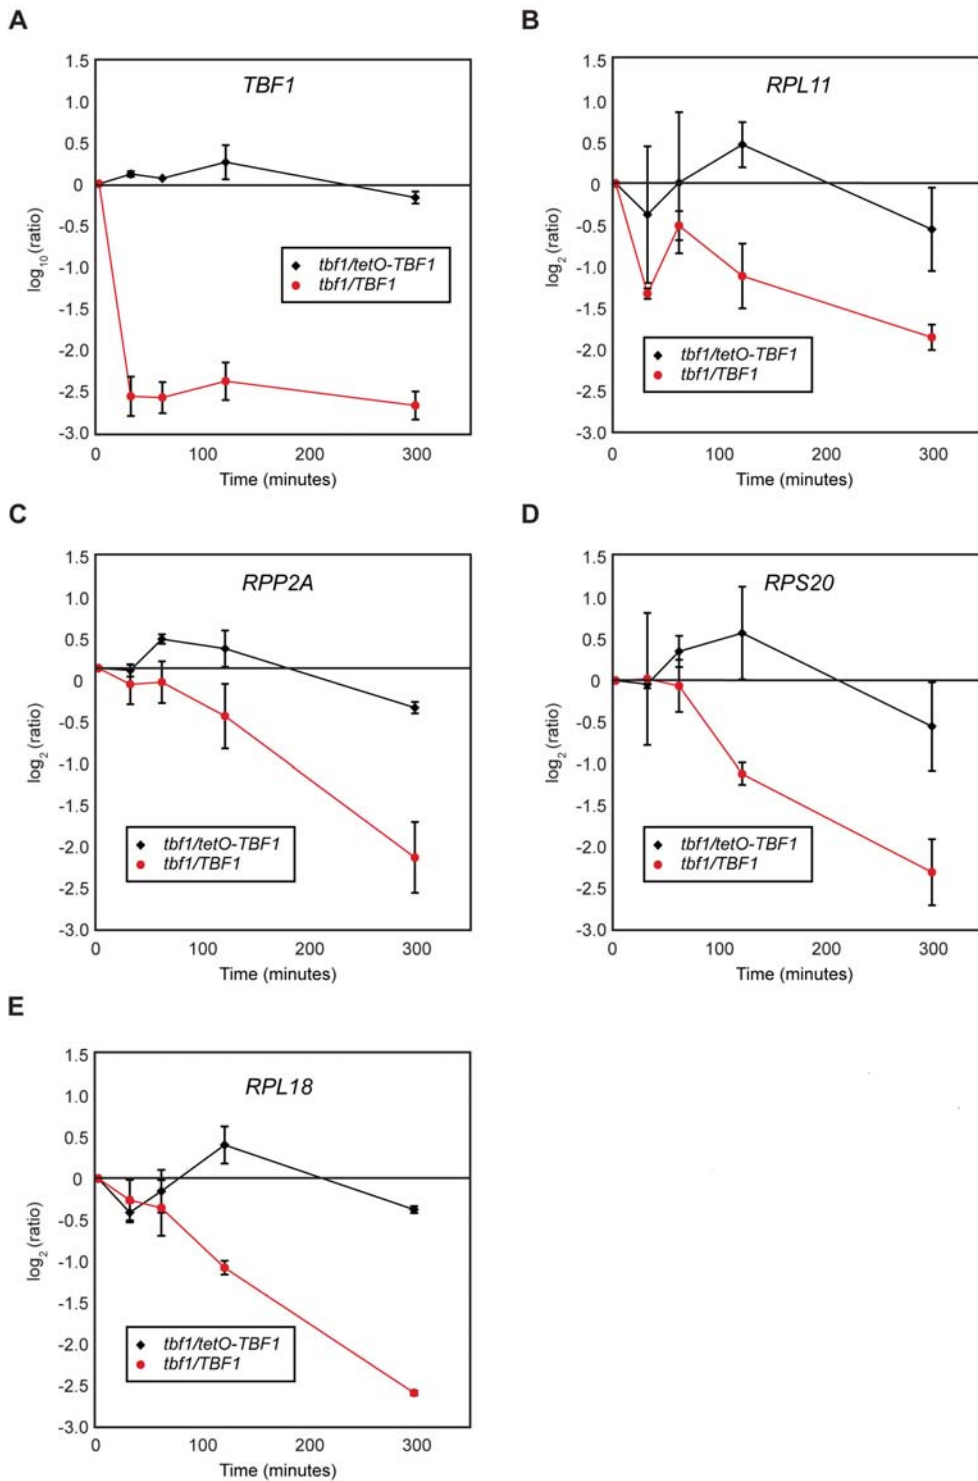

Figure S2. RT-qPCR validates the down-regulation of *TBF1* (A) and four target RP genes (B-E) in the *tbf1/tetO-TBF1* strain but not in the heterozygous *tbf1/TBF1* strain after tetracycline addition.

Species:

Necr\_Neurospora crassa  
 Boci\_Botrytis cinerea  
 Magr\_Magnaporthe grisea  
 Asni\_Aspergillus nidulans  
 Scpo\_Schizosaccharomyces pombe  
 Yali\_Yarrowia lipolytica  
 Caal\_Candida albicans  
 Catr\_Candida tropicalis  
 Deha\_Debaryomyces hansenii  
 Cagu\_Candida guilliermondii  
 Calu\_Candida lusitanae  
 Sace\_Saccharomyces cerevisiae  
 Cagl\_Candida glabrata  
 Klla\_Kluyveromyces lactis

CLUSTAL W (1.83) multiple sequence alignment

```

Necr_gi|85082158|ref|XP_956863      -----STRRPWTPDEEKALMMGLDM 732
Boci_BC1G_06358.1                  -----MAGLDS 6
Magr_gi|39943776|ref|XP_361425     -----STRRPWSPEEERALMTGLDL 803
Asni_gi|67515743|ref|XP_657757     -----SQRPPWTEEEENALMAGLDR 677
Scpo_gi|19112771|ref|NP_595979     -----RRSWTKEEEEALDGLDL 422
Yali_gi|50547139|ref|XP_501039     -----PVRPWSKAEAAALMNGLRT 458
Caal_gi|68469830|ref|XP_720925     -----RRAWSREEEKALRHAELEL 669
Catr_CTRG_01572.3                  -----RRPWTRREEEKALRHAELEL 817
Deha_gi|50419739|ref|XP_458398     -----KSLQRRPWTRREEEKALRHAELEL 721
Cagu_PGUG_03851.1                  -----RNPQRRPWTRDEEKALRQALEL 625
Calu_CLUG_01092.1                  -----KVTNRRPWTRREEEKALRHAELEL 732
Sace_gi|6325129|ref|NP_015197.     -----HNNSSNSNN-----NGSIGLRKPKAKRTWSKEEEEALVEGLKE 426
Cagl_gi|50294111|ref|XP_449467     GGENVHSQLVDSNNSILSDVISKSPSVKVVAKARTWSKEEEKTLITGLID 447
Klla_gi|50306773|ref|XP_453362     -----PKQKMMWTQEEEDCLKSGLQK 396

```

Pfam00249 (myb domain)

11111111111111111111

```

Necr_gi|85082158|ref|XP_956863     VKGPHWSQILSLFGAHGSVSDILKDRDQVQLKDKARNLKLFFLKTNSEMP 782
Boci_BC1G_06358.1                   VKGPHWSQILALYGDGKGSVSTILDRNQVQLKDKARNLKLFFLKSNIIEVP 56
Magr_gi|39943776|ref|XP_361425     VKGPHWSQILSLFPGNGTLDVVKDRSQVQLKDKARNLKLFFLKTNSEMP 853
Asni_gi|67515743|ref|XP_657757     VKGPHWSQILAMFPGGGTISEALKDRNQVQLKDKARNLKLFFLKSGLIEVP 727
Scpo_gi|19112771|ref|NP_595979     VKGPRWSQILELYGPGGKSEVLKYRNQVQLKDKARNMKLFFLKSQGVVP 472
Yali_gi|50547139|ref|XP_501039     VNGPYWSQILEIYGGGTVSEVLKDRNQVQLKDKARNLKLFFLKSGLIEVP 508
Caal_gi|68469830|ref|XP_720925     K-GPHWATILELFGQGGKI SEALKNRTQVQLKDKARNWKKFFLRSGLIEIP 718
Catr_CTRG_01572.3                   K-GPHWATILELFGQGGKI SEALKGRTQVQLKDKARNWKKFFLRSGLIEVP 866
Deha_gi|50419739|ref|XP_458398     K-GPLWSNILELFGAGGKI SEALKNRSQVQLKDKARNWKMFFLKSGLPVP 770
Cagu_PGUG_03851.1                   K-GPQWSTILELFGAGGKI SEALKNRRNQMLKDKARNWKMFFLKTGMPPVP 674
Calu_CLUG_01092.1                   K-GPSWSTILELFGQGGKINESLKNRTQVQLKDKARNWKMFFLKSGLPVP 781
Sace_gi|6325129|ref|NP_015197.     V-GPSWSKILDLYGPGGKITENLKNRTQVQLKDKARNWKLQYLKSGKPLP 475
Cagl_gi|50294111|ref|XP_449467     L-GPAWAKILDLYGPGGKINENLKNRTQVQLKDKARNWKLHLYLKTGKPLP 496
Klla_gi|50306773|ref|XP_453362     C-GPAWAKILSLYGGGTVSESLKNRSQVQLKDKARNWKMHYLKNMKPVP 445

```

\*\* \*: \*\* ::\* \* . \*: \*.:\*\*\*\*\* \* :\*: :\*

Pfam00249 (myb domain)

111111111111111111111111111111111111111111111111111

```

Necr_gi|85082158|ref|XP_956863     YYLQSVTGELKTRAPGQAAR--KEAEKARLNAEDEQARLAGIMTLGGLH 830
Boci_BC1G_06358.1                   YYLQCVTGELKTRAPTQAAR--KEAEERARLAGNEESARFHGVLALAAGM 104
Magr_gi|39943776|ref|XP_361425     YYLQSVTGELKTRAPNLSARKAREMEQAGVNAATEEQARAQGMAGLAHDS 903
Asni_gi|67515743|ref|XP_657757     YYLKQVVTGELKTRAPAQAAR--REARERQKKQGEEDKAHVEGIKGMMLA 775
Scpo_gi|19112771|ref|NP_595979     AALQCVTGDLRRD----- 485
Yali_gi|50547139|ref|XP_501039     DCLQFVTGGIKKGRRRGGAVEQRQRVQPQQVMQQVQQQQQQQQQQG 558
Caal_gi|68469830|ref|XP_720925     SYLRGVTGGVD-DGKRK---KDNVTKTAAAPVPMNSEQLQQQQQ----- 759
Catr_CTRG_01572.3                   SYLQGVVTGGVD-DNKNK---KSRRTKTSAAPVPMNQKQKAKSKENEADK 912
Deha_gi|50419739|ref|XP_458398     AYLQKVTGDLERDRLRQNKRLNRRKTAAPVPTPIQNQKSPGQ----- 815
Cagu_PGUG_03851.1                   TYLQKVTGDLEREDRSREAKRS-RSRKTAAPVPS-IK----- 710
Calu_CLUG_01092.1                   AYLKSVTGDLERDDKSR--AKNARNKTAAPVPTVAKKDGEGETAFNG 829
Sace_gi|6325129|ref|NP_015197.     DYLIKVTGNLEKIYKAKKFKSPSPNSSTIMEQNLSQLHSSAASATEDTQT 525
Cagl_gi|50294111|ref|XP_449467     EYLNKVTGNLDKIAKTKRR----- 515
Klla_gi|50306773|ref|XP_453362     EYLEKVTGDLERGLKSKKK----- 464

```

\*\*\* :

Figure S3. Multiple sequence alignment of Tbf1 orthologs in ascomycetes species showing conservation of the myb DNA-binding domain (pfam00249).
